# Supplementary material for: Evolution of imprinting via lineage-specific insertion of retroviral promoters
Source: PubMed Central journal article supplement (PMC6908575; doi:10.1038/s41467-019-13662-9), 2019-12-12
Supplement: 41467_2019_13662_MOESM3_ESM.pdf [file 41467_2019_13662_MOESM3_ESM.pdf]

### **Description of Additional Supplementary Files**

File Name: Supplementary Data 1

Description: Datasets used in this study

File Name: Supplementary Data 2

Description: Human and mouse igDMRs investigated in this study

File Name: Supplementary Data 3

Description: Oligonucleotide primers used in this study
